# Supplementary material for: A Genomic-Clinicopathologic Nomogram Predicts Survival for Patients with Laryngeal Squamous Cell Carcinoma
Source: Hindawi journal article supplement (doi:10.1155/2019/5980567), 2019-11-20
Supplement: f4 [file 5980567.f4.pdf]

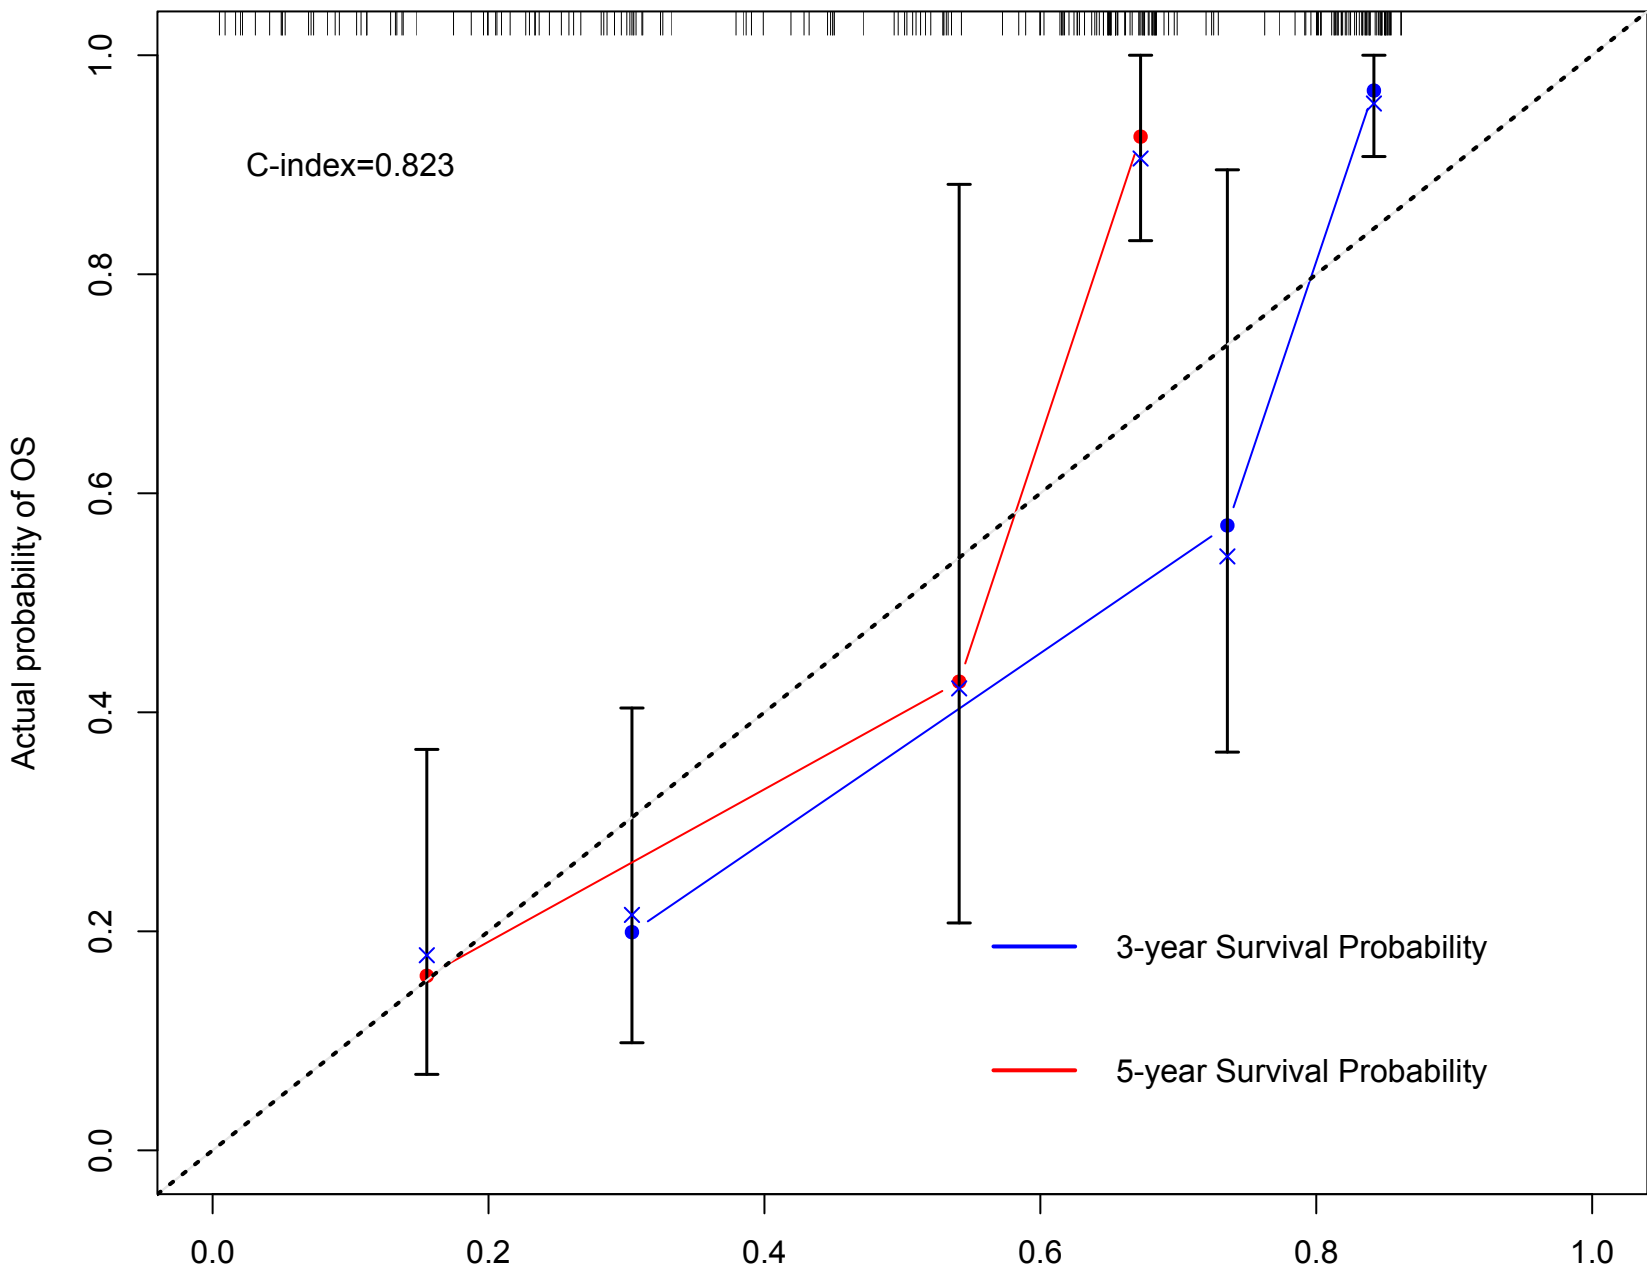

n=109 d=49 p=3, 30 subjects per group  
 Gray: ideal

Predicted probability of OS

X - resampling optimism added, B=998  
 Based on observed-predicted
