# Supplementary material for: A Genomic-Clinicopathologic Nomogram Predicts Survival for Patients with Laryngeal Squamous Cell Carcinoma
Source: Hindawi journal article supplement (doi:10.1155/2019/5980567), 2019-11-20

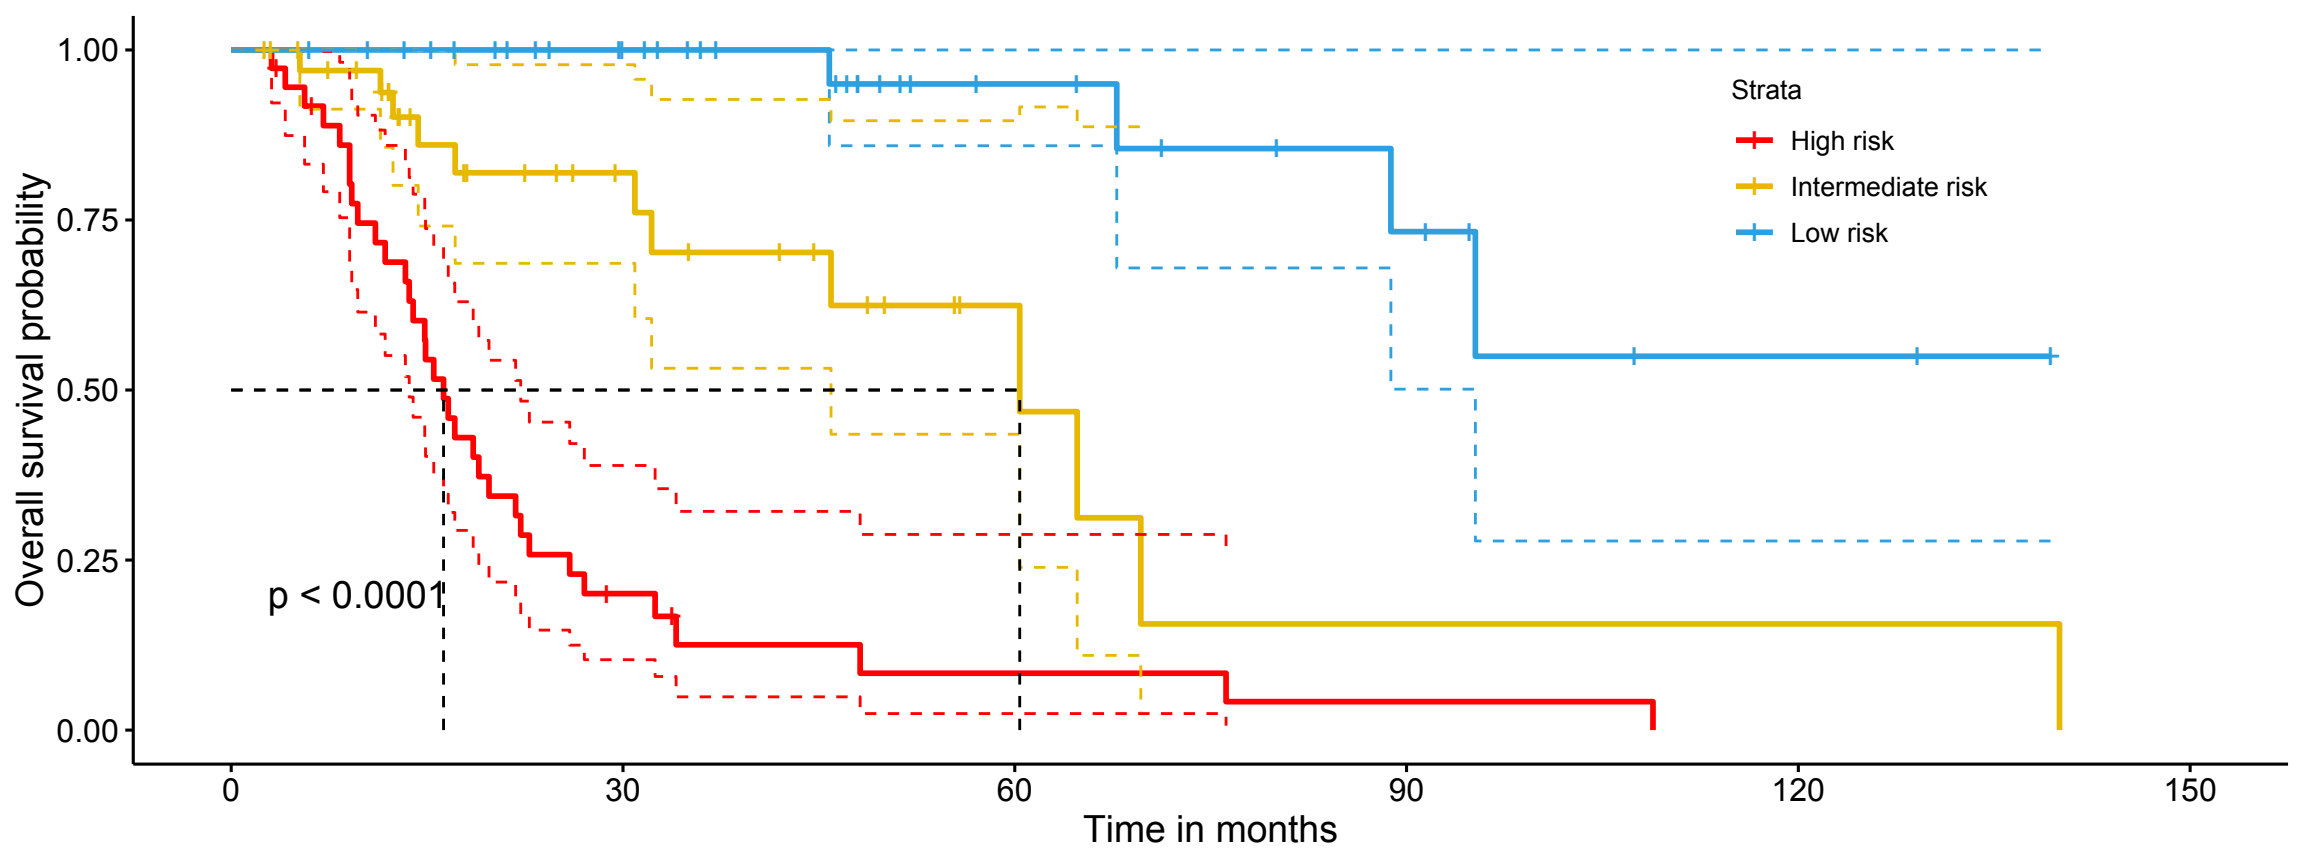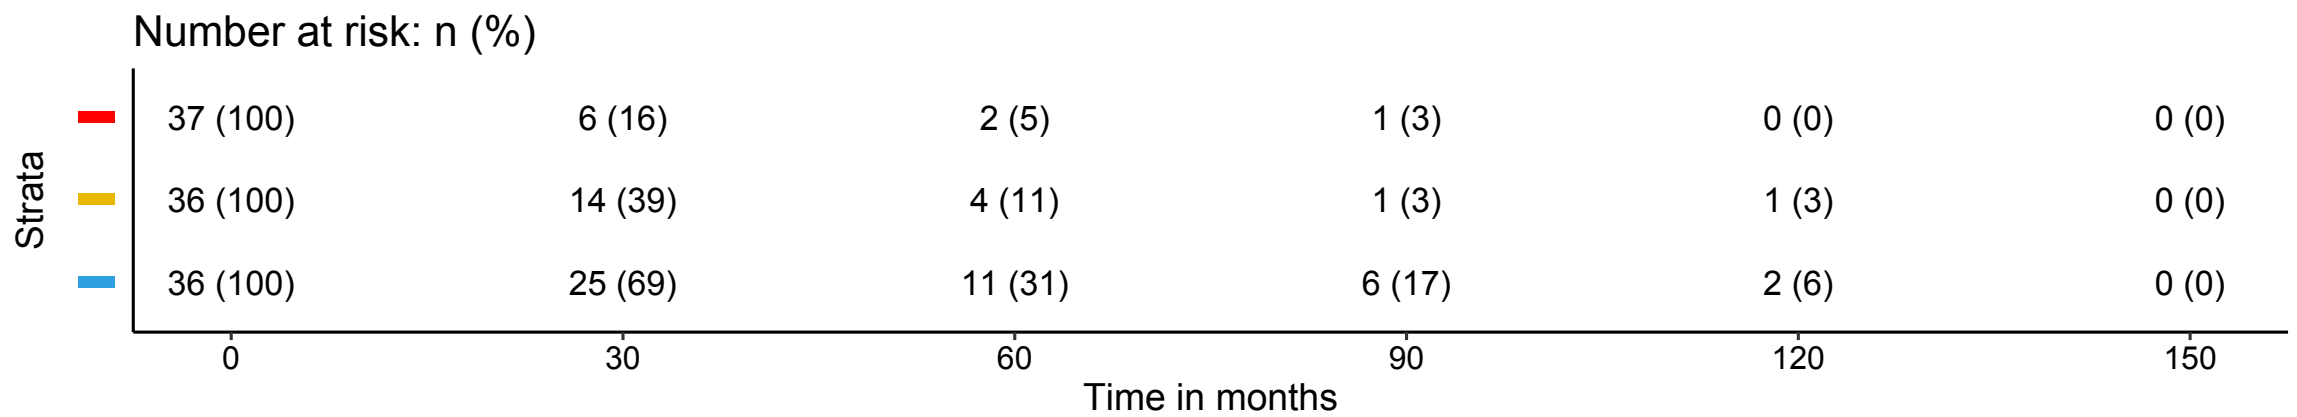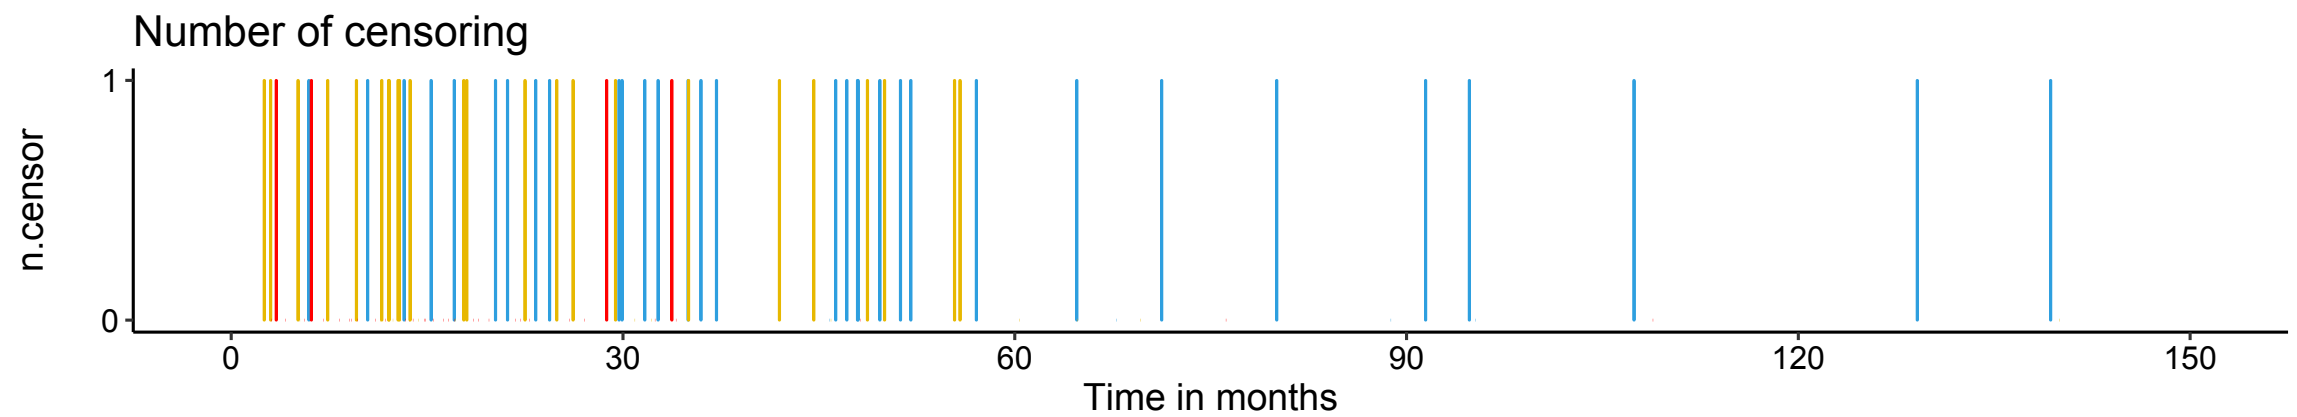

Supplement: f5 [file 5980567.f5.pdf]
